# Supplementary material
Source: bioRxiv or medRxiv preprint supplement (https://www.biorxiv.org/content/biorxiv/early/2019/06/26/678292/DC1/embed/media-1.pdf)
Supplement: Supplementary file [file media-1.pdf]

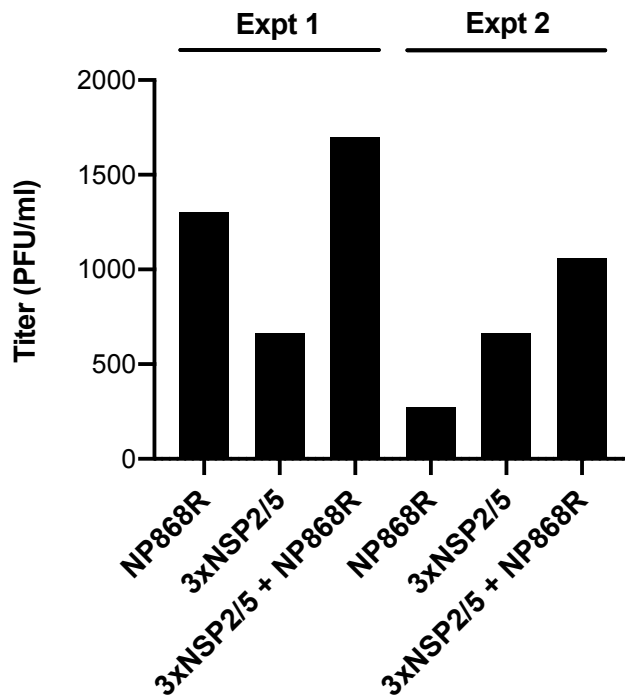

**Figure S1.** Influence of plasmids on the recovery of recombinant RVAs. In two independent RG experiments, BHK-T7 cells were co-transfected with mixtures of pT7 SA11 plasmids that contained pT7/NSP3-3xFL-UnaG in place of pT7/NSP3SA11. As indicated, some plasmid mixtures included pCMV/NP868R and/or 3x levels of pT7 NSP2SA11 and NSP5SA11 plasmids. After 2 days, transfected BHK-T7 cells were overseeded with MA104 cells. Titers of viruses in lysates prepared from the MA104/BHK-T7 cells at 5 days p.i. were determined by plaque assay. Each RG experiment was performed with a separately prepared set of plasmids, and plaque assays were performed in duplicate.
